# Supplementary material for: Highly efficient narrowed emitting AgInxGa1−xS2/AgGaS2 quantum dots via an HF-assisted one-pot synthesis strategy and their light-emitting diodes
Source: Royal Society of Chemistry journal article supplement (doi:10.1039/d4tc00615a), 2024-01-01
Supplement: d4tc00615a1.pdf [file d4tc00615a1.pdf]

## Supplementary Information

### Highly Efficient Narrowed Emitting $\text{AgIn}_x\text{Ga}_{1-x}\text{S}_2/\text{AgGaS}_2$ Quantum Dots via HF-Assisted One-Pot Synthesis Strategy and Their Light-emitting Diodes

Zilong Li,<sup>ab</sup> Sheng Cao,<sup>\*ac</sup> Kai Wang,<sup>b</sup> Qiuyan Li,<sup>ac</sup> Yuanjin Huang,<sup>ac</sup> Hui Fu,<sup>b</sup> Jialong Zhao,<sup>ac</sup> Weiyu Yang,<sup>b</sup> and Jinju Zheng<sup>\*b</sup>

<sup>a</sup> School of Resources, Environment, and Materials, State Key Laboratory of Featured Metal Materials and Life-cycle Safety for Composite Structures, Guangxi University, Nanning 530004, China.

<sup>b</sup> Institute of Micro/Nano Materials and Devices, Ningbo University of Technology, Ningbo 315211, China.

<sup>c</sup> School of Physical Science and Technology, Guangxi University, Nanning 530004, China.

\* Corresponding author. E-mails: caosheng@gxu.edu.cn (S. Cao), zhengzhao2007@163.com (J. Zheng)

**Table S1.** Performance summary of Ag-In-S QDs with narrow band emission.

| QDs                                 | Year | FWHM [nm] | $\lambda$ [nm] | PL QY [%] | Synthesis Method | Synthesis Step | ref       |
|-------------------------------------|------|-----------|----------------|-----------|------------------|----------------|-----------|
| AIS/GaS <sub>x</sub>                | 2018 | 28.6      | 585            | 28.8%     | HU               | two            | 1         |
| AIS/GaS <sub>x</sub>                | 2019 | 32        | 582            | 49.2%     | HI               | two            | 2         |
| AIS/GaS <sub>x</sub>                | 2022 | ~30       | 530-606        | 29%-40%   | HI               | two            | 3         |
| AIS/GaS <sub>x</sub>                | 2022 | 36        | 581            | 87.4%     | HI               | two            | 4         |
| AIS/GaS <sub>x</sub> /ZnS           | 2023 | 45        | 575            | 60%       | HI               | four           | 5         |
| AIS/Ga-S-Se                         | 2023 | 64        | 733            | 25        | HI               | two            | 6         |
| AIS/AIGS/GS                         | 2023 | 35        | 602            | 3%        | HI               | three          | 7         |
| AIGS/GaS <sub>x</sub>               | 2018 | 43-50     | 500-610        | 4%-28%    | HU               | two            | 8         |
| AIGS/GaS <sub>x</sub>               | 2021 | 32-42     | 498-602        | 28%-59%   | HU               | two            | 9         |
| AIGS/GaS <sub>x</sub>               | 2023 | 31-37     | 499-543        | 20%-75%   | HI               | two            | 10        |
| AIGS/GaS <sub>x</sub>               | 2023 | 31        | 532            | 55%       | HI               | two            | 11        |
| AIGS/AGS                            | 2023 | 30-55     | 468-610        | 50%-96%   | HI               | two            | 12        |
| AIGS/Ga <sub>2</sub> O <sub>3</sub> | 2023 | 44        | 563            | 58%       | HU               | one            | 13        |
| AIGS/AGS                            |      | 33        | 532            | 45%       | HI               | one            | This work |

**HU:** Heating Up / **HI:** Hot Injection

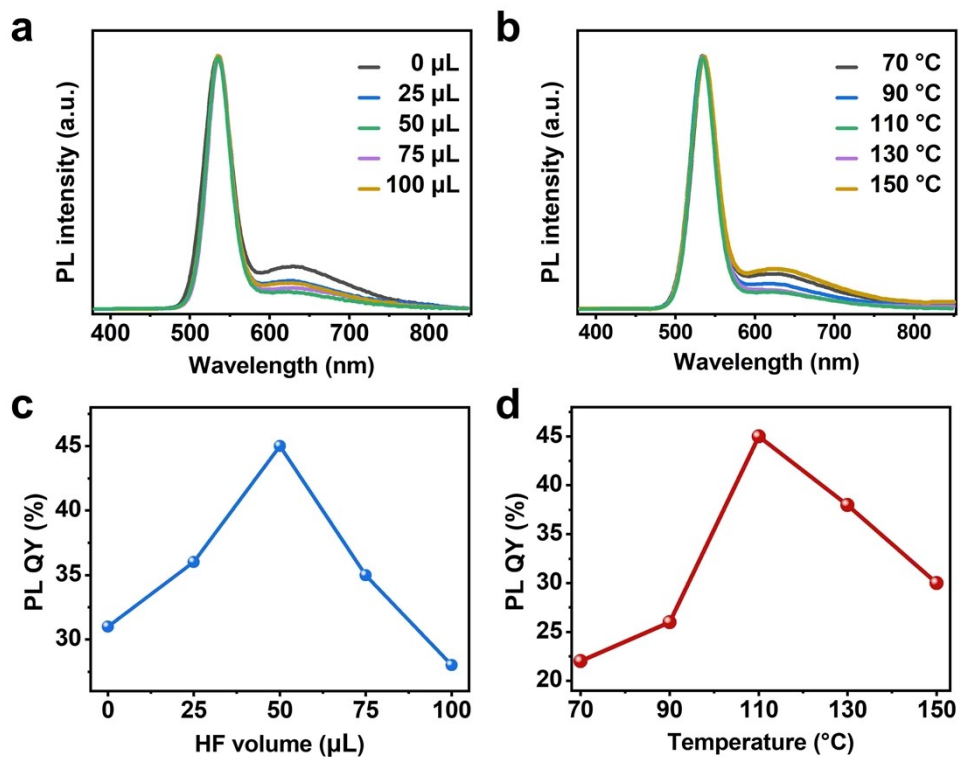

**Figure S1.** PL spectra of AIGS/AGS QDs with HF (3 wt%) treatment. PL spectra at different loading amounts (a) and PL spectra at different reaction temperatures (b) before AGS shell coating. The variation of PL QY of the AIGS/AGS QDs obtained at different loading amounts (c) and different reaction (d) temperatures.

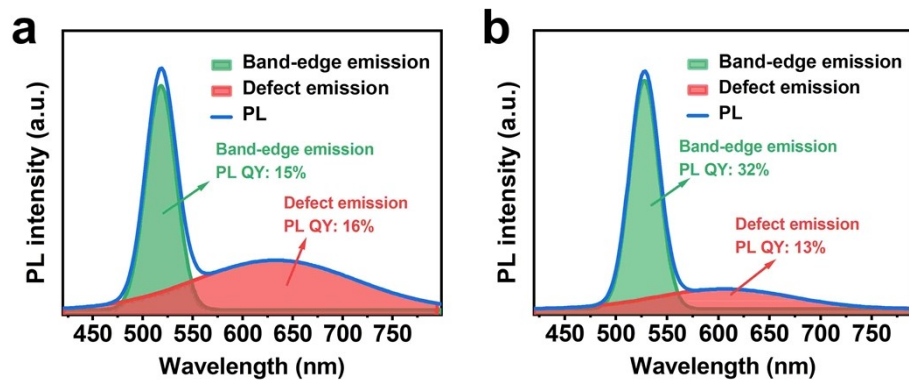

**Figure S2.** The ratio of band-edge emission and defect emission in the PL spectra of AIGS/AGS QDs (a) and AIGS/AGS-HF QDs (b).

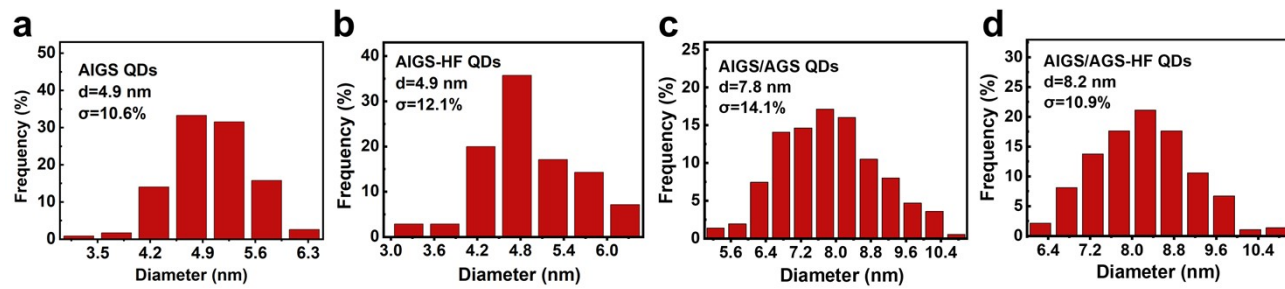

**Figure S3.** Size distribution histograms of (a) AIGS cores, (b) AIGS-HF cores, (c) AIGS/AGS QDs, and (d) AIGS/AGS-HF QDs.

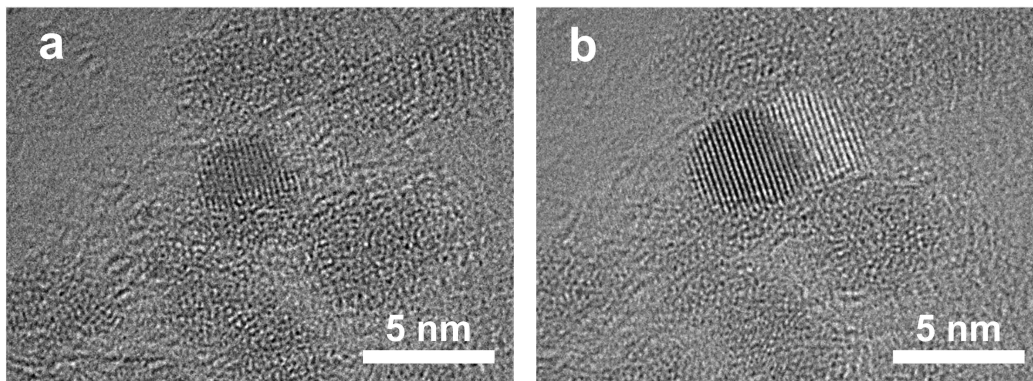

**Figure S4.** HRTEM images of AIGS cores before (a) and after (b) prolonged electron beam irradiation.

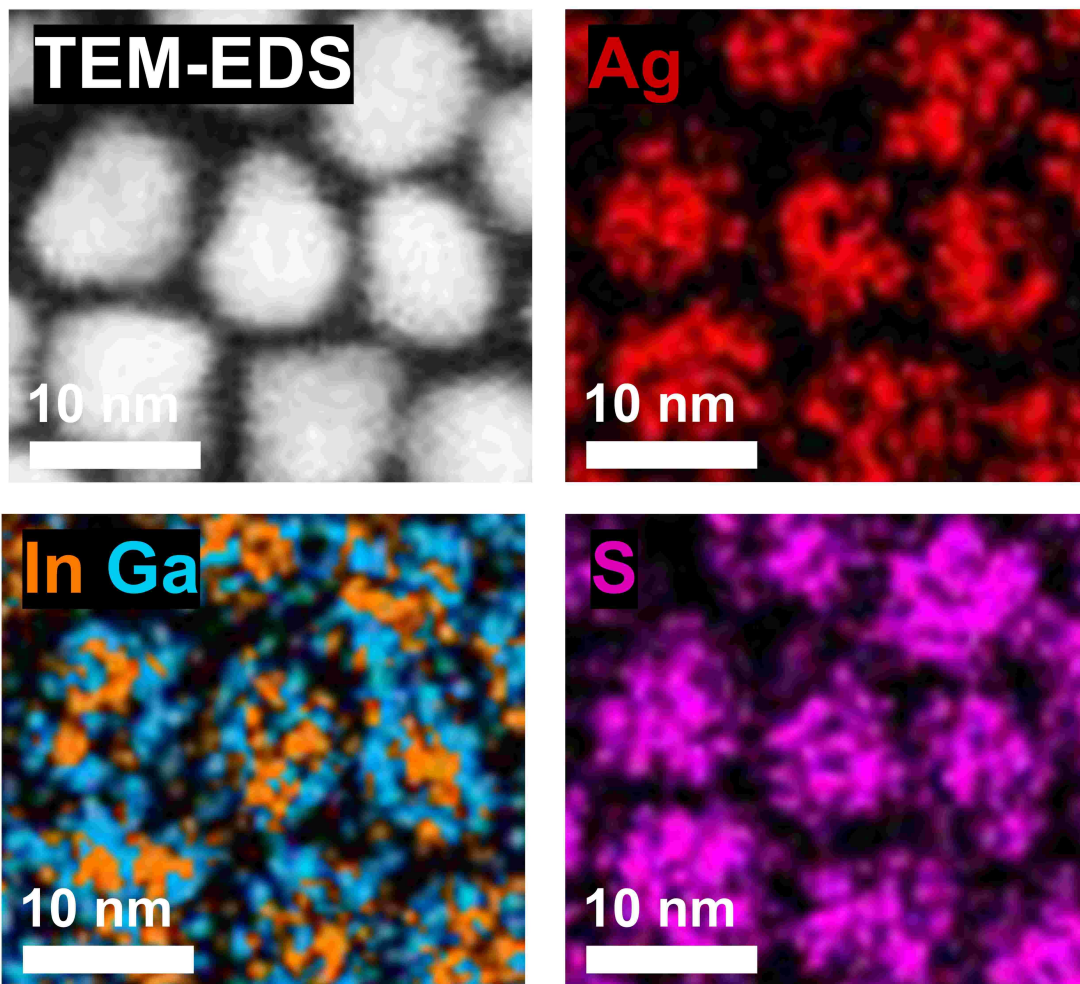

**Figure S5.** High-angle annular dark-field TEM image and EDS elemental mapping of Ag (red), In (orange), Ga (blue), and S (violet) for AIGS/AGS QDs.

**Table S2.** Composition ratios calculated from EDS data in atomic% in AIGS cores, AIGS-HF cores, and normalized ratios of AIGS-HF cores excluding the F element.

| QDs                     | Ag   | In    | Ga   | S    | F   |
|-------------------------|------|-------|------|------|-----|
| AIGS                    | 20.2 | 16.3  | 23.3 | 40.2 | 0   |
| AIGS-HF                 | 20.4 | 16.2. | 20.8 | 38.2 | 4.4 |
| AIGS-HF<br>(normalized) | 21.3 | 16.9  | 21.8 | 40.0 | /   |



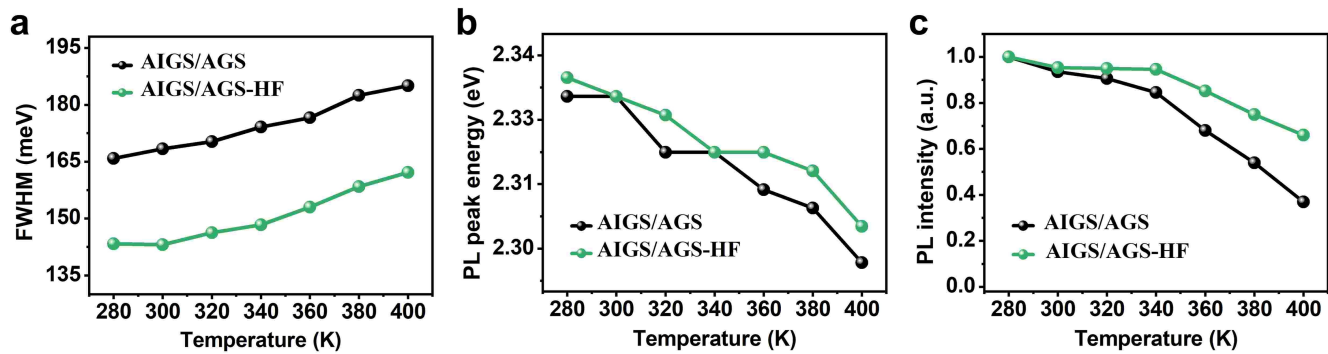

**Figure S6.** Variation in FWHM (a), PL peak energy (b) and PL intensity (c) with temperature of AIGS/AGS QDs and AIGS/AGS-HF QDs.

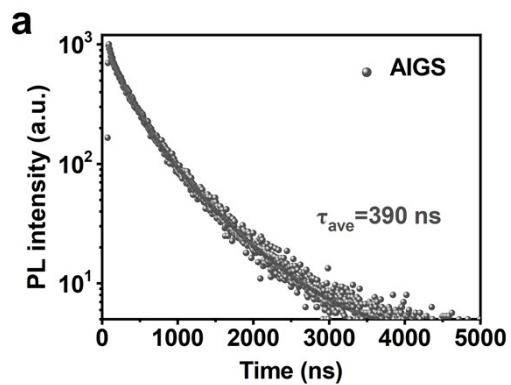

**Figure S7.** PL decay curve of AIGS cores.

**Table S3.** PL decay components of AIGS cores, AIGS/AGS QDs, and AIGS/AGS-HF QDs.

| Sample           | PL peak (nm) | A <sub>1</sub> (%) | $\tau_1$ (ns) | A <sub>2</sub> (%) | $\tau_2$ (ns) | $\chi^2$ | $\tau_{ave}$ (ns) |
|------------------|--------------|--------------------|---------------|--------------------|---------------|----------|-------------------|
| AIGS cores       | 669          | 50                 | 89            | 50                 | 445           | 0.99     | 390               |
| AIGS/AGS QDs     | 532          | 85                 | 24            | 15                 | 130           | 0.99     | 77                |
| AIGS/AGS -HF QDs | 532          | 72                 | 40            | 28                 | 150           | 0.99     | 105               |

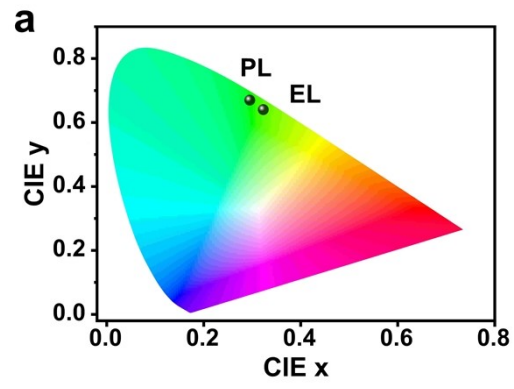

**Figure S8.** CIE coordinate of EL of QLED and PL of AIGS/AGS-HF QDs.

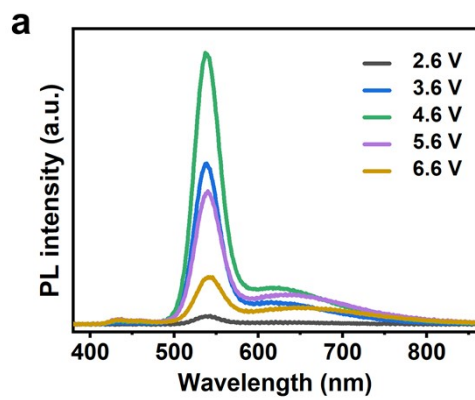

**Figure S9.** Electroluminescence (EL) spectra of the QLED at various voltages.

**Table S4.** Performance summary of green-QLEDs based on narrow-emitting I-III-VI QDs.

| QDs                                 | EL<br>[nm] | FWHM<br>[nm] | EQE<br>[%] | V <sub>on</sub><br>[V] | L <sub>max</sub><br>[cd A <sup>-1</sup> ] | ref       |
|-------------------------------------|------------|--------------|------------|------------------------|-------------------------------------------|-----------|
| AIS/GaS <sub>x</sub>                | 570        | 44           | 0.54       | 2.8                    | 60.3                                      | 14        |
| AIGS/GaS <sub>x</sub>               | 539        | 39           |            | 2.0                    | ~10                                       | 15        |
| AIGS/GaS <sub>x</sub>               | 531        | 33           | 1.1        | 2.4                    | 175                                       | 16        |
| AIGS/GaS <sub>x</sub>               | 529        | 32           | 1.5        | 2.4                    | 57                                        | 11        |
| AIGS/Ga <sub>2</sub> O <sub>3</sub> | 563        | 49           | 0.65       | 3.2                    | ~50                                       | 13        |
| AIGS/AGS                            | 535        | 36           | 0.75       | 2.2                    | 2747                                      | This work |

## References

- 1 T. Uematsu, K. Wajima, D. K. Sharma, S. Hirata, T. Yamamoto, T. Kameyama, M. Vacha, T. Torimoto and S. Kuwabata, Narrow Band-edge Photoluminescence from AgInS<sub>2</sub> Semiconductor Nanoparticles by the Formation of Amorphous III-VI Semiconductor Shells, *NPG Asia Mater.*, 2018, **10**, 713-726.
- 2 W. Hoisang, T. Uematsu, T. Yamamoto, T. Torimoto and S. Kuwabata, Core Nanoparticle Engineering for Narrower and More Intense Band-edge Emission from AgInS<sub>2</sub>/GaS<sub>x</sub> Core/shell Quantum Dots. *Nanomaterials*, 2019, **9**.
- 3 T. Thi Thu Huong, N. T. Loan, T. D. T. Ung, N. T. Tung, H. Han and N. Q. Liem, Systematic Synthesis of Different-sized AgInS<sub>2</sub>/GaS<sub>x</sub> Nanocrystals for Emitting the Strong and Narrow Excitonic Luminescence, *Nanotechnology*, 2022, **33**, 355704.
- 4 M. Tepakidarekul, T. Uematsu, T. Torimoto and S. Kuwabata, Encapsulation of AgInS<sub>2</sub>/GaS<sub>x</sub> Core/shell Quantum Dots in In-fumarate Metal-organic Frameworks for Stability Enhancement, *CrystEngComm*, 2022, **24**, 3715-3723.
- 5 N. T. Loan, T. T. T. Huong, M. A. Luong, L. Van Long, H. Han, T. D. T. Ung and N. Q. Liem, Double-shelling AgInS<sub>2</sub> Nanocrystals with GaS<sub>x</sub>/ZnS to Make Them Emit Bright and Stable Excitonic Luminescence, *Nanotechnology*, 2023, **34**, 315601.
- 6 N. Krobkrong, T. Uematsu, T. Torimoto and S. Kuwabata, Emission Tuning of AgInS<sub>2</sub>-based Core/shell Semiconductor Quantum Dots with Type-II and Quasi-type-II Band Alignments, *Jpn. J. Appl. Phys.*, 2023, **62**, 061003.
- 7 N. T. Loan, T. T. T. Huong, M. A. Luong, L. Van Long, H. Han, T. D. T. Ung and N. Q. Liem, Double-shelling AgInS<sub>2</sub> Nanocrystals with GaS<sub>x</sub>/ZnS to Make Them Emit Bright and Stable Excitonic Luminescence, *Nanotechnology*, 2023, **34**, 315601.
- 8 T. Kameyama, M. Kishi, C. Miyamae, D. K. Sharma, S. Hirata, T. Yamamoto, T. Uematsu, M. Vacha, S. Kuwabata and T. Torimoto, Wavelength-tunable Band-edge Photoluminescence of Nonstoichiometric Ag-In-S Nanoparticles via Ga<sup>3+</sup> Doping, *ACS Appl. Mater. Interfaces*, 2018, **10**,

42844-42855.

- 9 W. Hoisang, T. Uematsu, T. Torimoto and S. Kuwabata, Luminescent Quaternary Ag(In<sub>x</sub>Ga<sub>1-x</sub>)S<sub>2</sub>/GaS<sub>y</sub> Core/shell Quantum Dots Prepared Using Dithiocarbamate Compounds and Photoluminescence Recovery via Post Treatment, *Inorg. Chem.*, 2021, 60, 13101-13109.
- 10 T. Uematsu, M. Tepakidarekul, T. Hirano, T. Torimoto and S. Kuwabata, Facile High-Yield Synthesis of Ag-In-Ga-S Quaternary Quantum Dots and Coating with Gallium Sulfide Shells for Narrow Band-edge Emission, *Chem. Mater.*, 2023, 35, 1094-1106.
- 11 T. Uematsu, R. Izumi, S. Sugano, R. Sugano, T. Hirano, G. Motomura, T. Torimoto and S. Kuwabata, Spectrally Narrow Band-edge Photoluminescence from AgInS<sub>2</sub>-based Core/shell Quantum Dots for Electroluminescence Applications, *Faraday Discuss.*, 2023, DOI: 10.1039/d3fd00142c.
- 12 H. J. Lee, S. Im, D. Jung, K. Kim, J. A. Chae, J. Lim, J. W. Park, D. Shin, K. Char, B. G. Jeong, J.-S. Park, E. Hwang, D. C. Lee, Y.-S. Park, H.-J. Song, J. H. Chang and W. K. Bae, Coherent Heteroepitaxial Growth of I-III-VI<sub>2</sub> Ag(In,Ga)S<sub>2</sub> Colloidal Nanocrystals with Near-unity Quantum Yield for Use in Luminescent Solar Concentrators, *Nat. Commun.*, 2023, 14, 3779.
- 13 M. Tozawa, C. Miyamae, K. Akiyoshi, T. Kameyama, T. Yamamoto, G. Motomura, Y. Fujisaki, T. Uematsu, S. Kuwabata and T. Torimoto, One-pot Synthesis of Ag-In-Ga-S Nanocrystals Embedded in a Ga<sub>2</sub>O<sub>3</sub> Matrix and Enhancement of Band-edge Emission by Na<sup>+</sup> Doping, *Nanoscale Adv.*, 2023, 5, 7057-7066.
- 14 G. Motomura, K. Ogura, Y. Iwasaki, T. Uematsu, S. Kuwabata, T. Kameyama, T. Torimoto and T. Tsuzuki, Electroluminescence from Band-edge-emitting AgInS<sub>2</sub>/GaS<sub>x</sub> Core/shell Quantum Dots, *Appl. Phys. Lett.*, 2020, 117, 091101.
- 15 G. Motomura, Y. Iwasaki, T. Kameyama, T. Torimoto, T. Uematsu, S. Kuwabata and T. Tsuzuki, Green Electroluminescence Generated by Band-edge Transition in Ag-In-Ga-S/GaS<sub>x</sub> Core/shell Quantum Dots, *ITE Trans. on MTA*, 2021, 9, 222-227.
- 16 G. Motomura, T. Uematsu, S. Kuwabata, T. Kameyama, T. Torimoto and T. Tsuzuki, Quantum-Dot Light-emitting Diodes Exhibiting Narrow-Spectrum Green Electroluminescence by Using Ag-In-
